# Supplementary material for: Spent turmeric reduces fat mass in rats fed a high-fat diet
Source: Royal Society of Chemistry journal article supplement (doi:10.1039/c5fo00764j), 2015-11-05
Supplement: c5fo00764j1.pdf [file c5fo00764j1.pdf]

**Table** Fasting serum triglyceride concentration in F344 male rats fed low-fat diet (LF) and high-fat diet (HF) for 28 d

|                                   | Dietary group |           |           |           |           |
|-----------------------------------|---------------|-----------|-----------|-----------|-----------|
|                                   | 0 wk          | 1 wk      | 2 wk      | 3 wk      | 4 wk      |
| Serum triglyceride, <i>mmol/L</i> |               |           |           |           |           |
| LF                                | 0.75±0.05     | 0.89±0.13 | 0.94±0.13 | 1.02±0.22 | 1.08±0.29 |
| HF                                | 0.69 ±0.09    | 0.91±0.2  | 0.99±0.11 | 0.99±0.06 | 0.77±0.17 |
| P-value                           | 0.260         | 0.897     | 0.510     | 0.773     | 0.104     |

Values are mean ± SD, *n* = 5. Significant different between the LF and HF groups was determined by student's t-test. This is unpublished data.

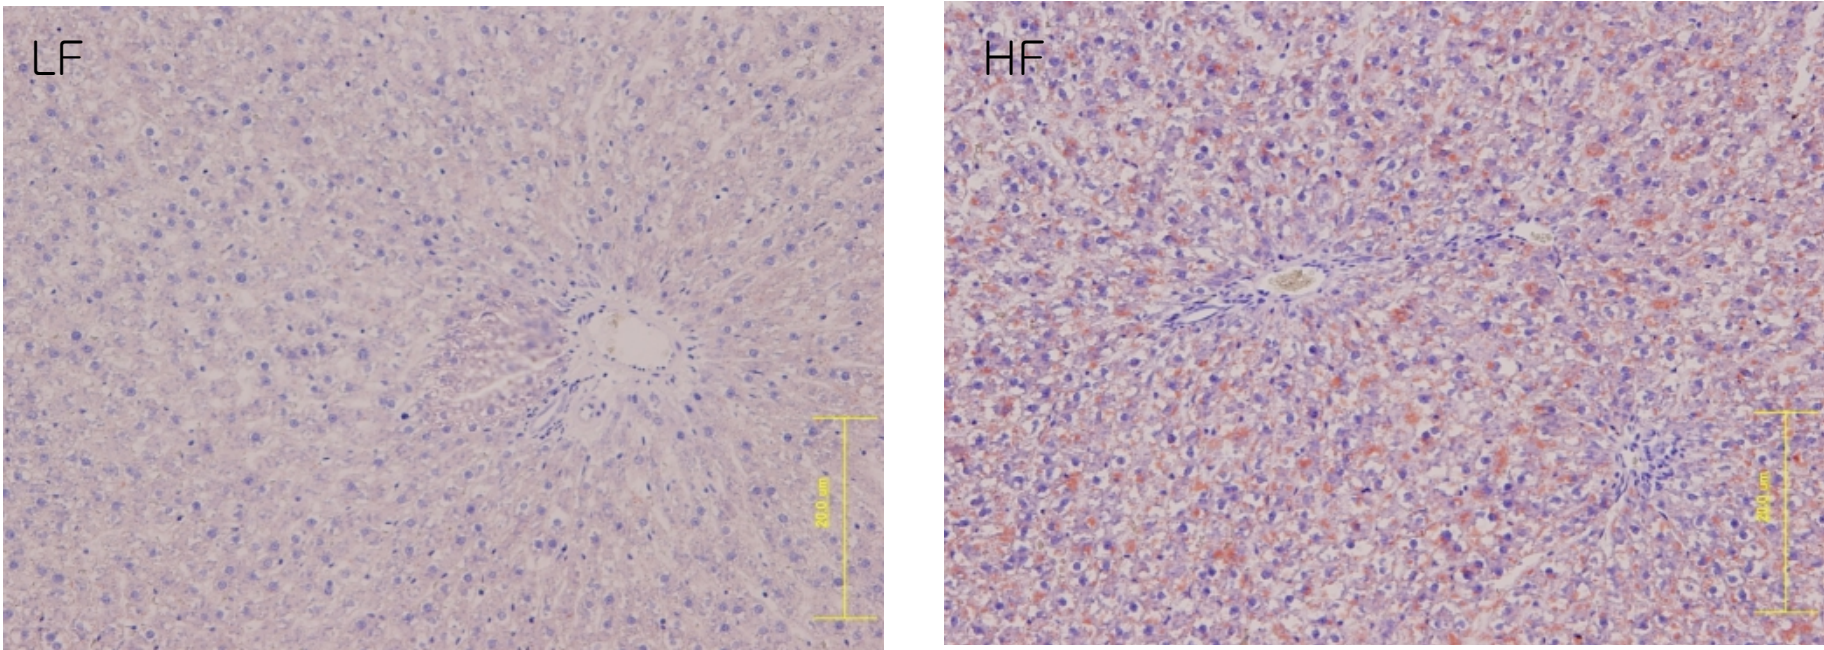

**Figure** Histological examination of the liver tissue from rats fed low-fat diet (LF) and high-fat diet (HF) for 28 d
